# Supplementary material
Source: MDPI journal article supplement (https://www.mdpi.com/2073-4360/5/4/1325)

## Supporting Information

**Figure S1.** Time dependence of the transmittance spectra of (a) nanofiber mat and (b) P3HT/PMMA nanofiber composite film before and after doping by  $\text{FeCl}_3$ ; measurements were carried out in air at room temperature.

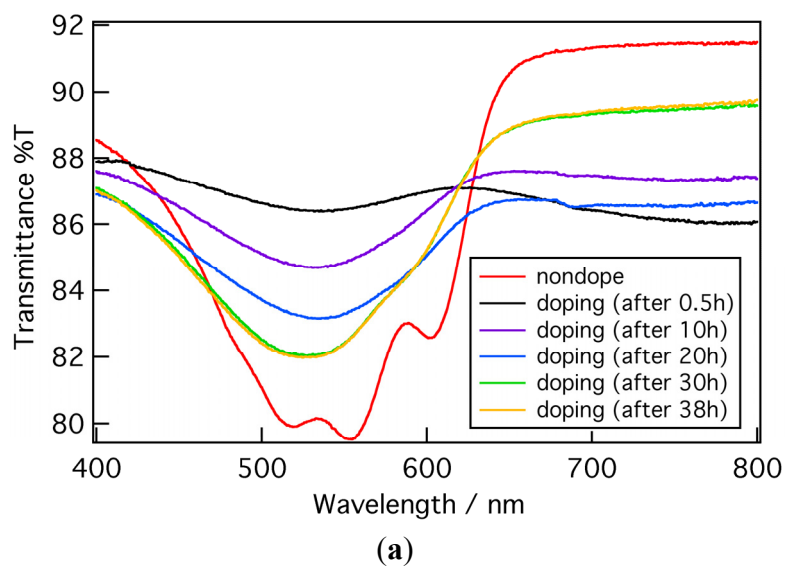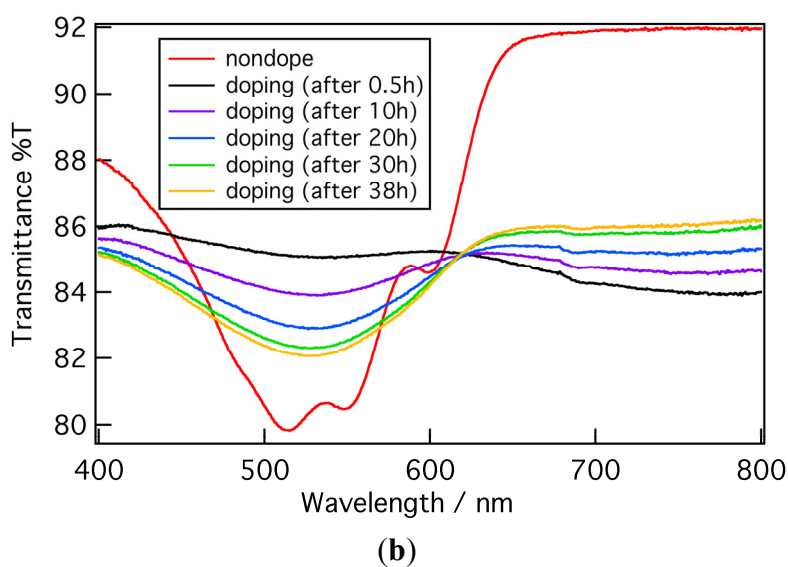

**Figure S2.** Time dependence of the transmittance spectra of (a) nanofiber mat and (b) P3HT/PMMA nanofiber composite film before and after doping by  $\text{AuCl}_3$ ; measurements were carried out in air at room temperature.

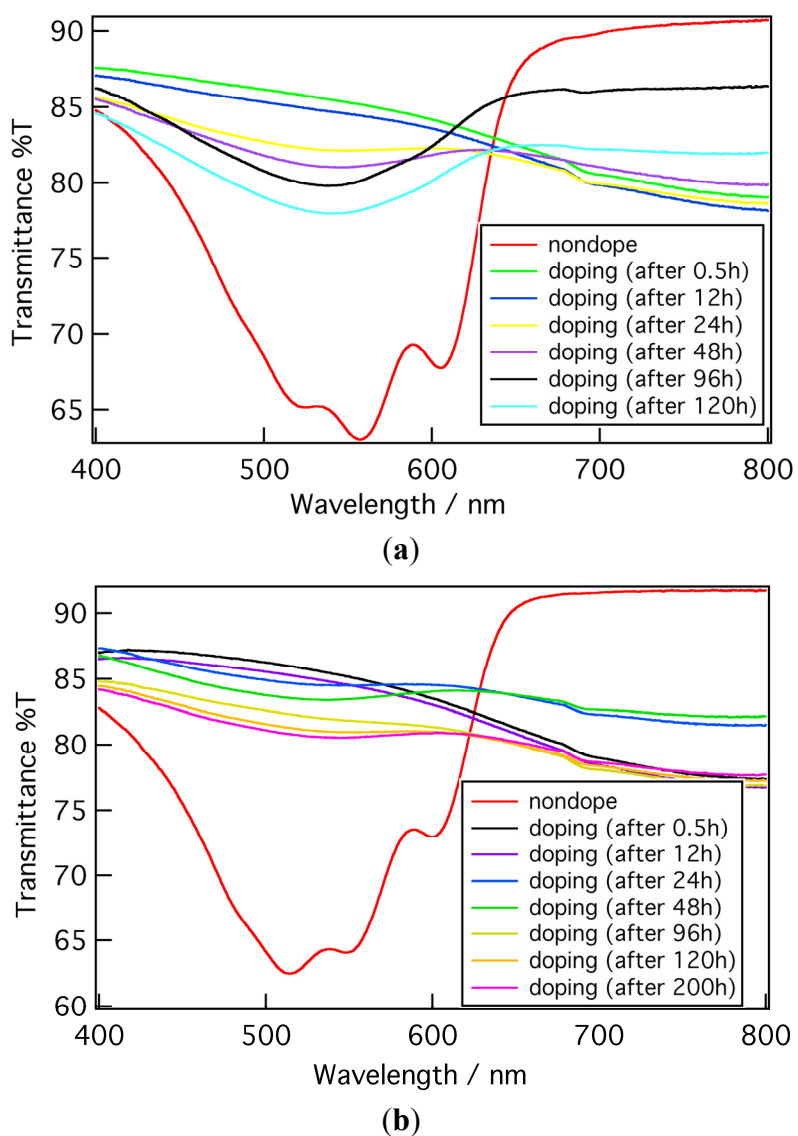

Supplement: s1 [file s1]
